# Supplementary material for: Three-dimensional interconnected microporous poly(dimethylsiloxane) microfluidic devices
Source: Royal Society of Chemistry journal article supplement (doi:10.1039/c0lc00660b), 2011-01-01
Supplement: c0lc00660b.pdf [file c0lc00660b.pdf]

## Electronic Supplementary Information (ESI)

### Three-Dimensional Interconnected Microporous Poly(dimethylsiloxane) Microfluidic Devices

Po Ki Yuen\*, Hui Su, Vasily N. Goral and Katherine A. Fink  
Science and Technology, Corning Incorporated, Corning, New York 14831-0001  
Email: yuenp@corning.com

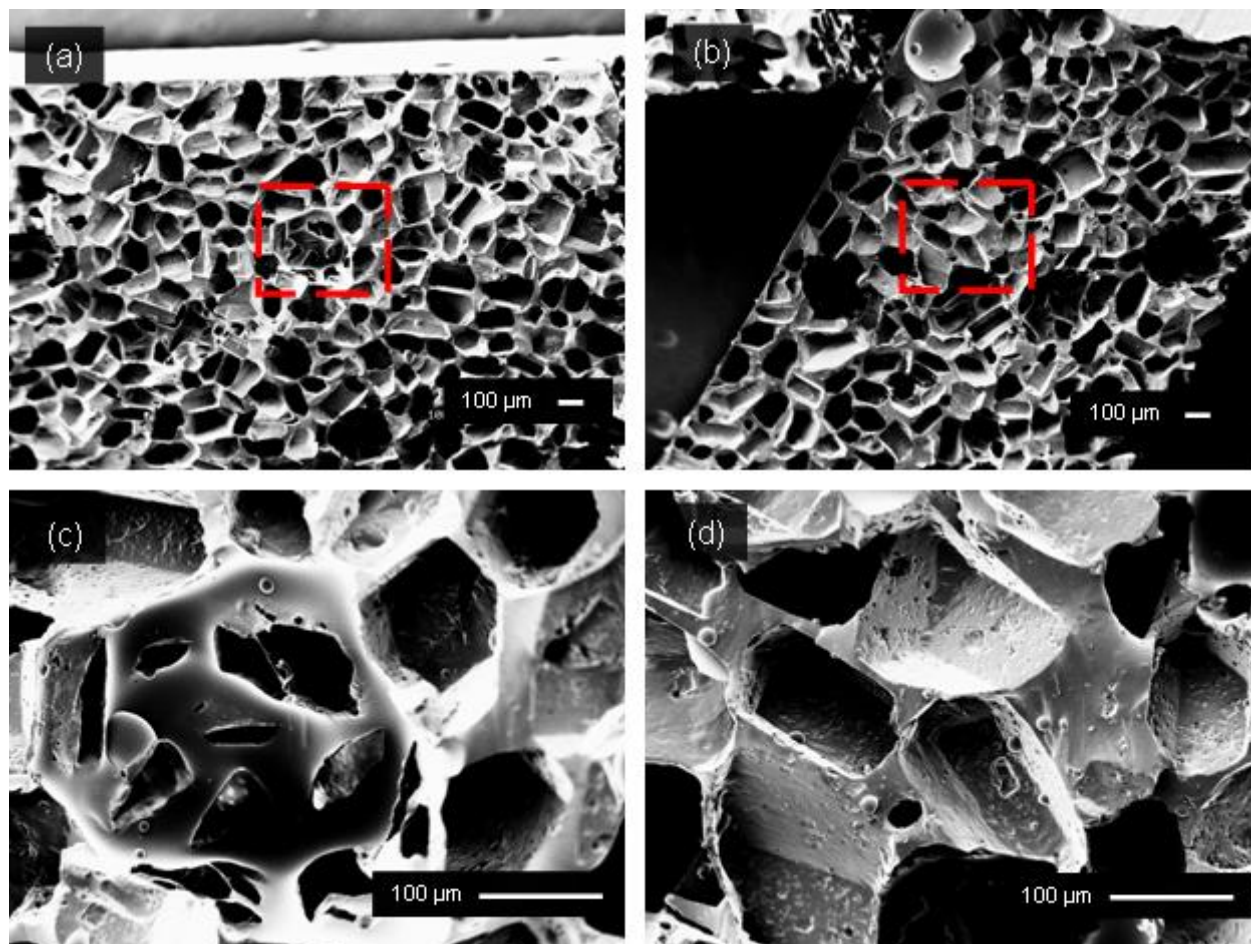

**Fig. S1** SEM images of microporous PDMS structures fabricated from 150 μm – 180 μm sugar particles. (a) and (c) Top view. (b) and (d) Cross-sectional view. (c) and (d) are the zoom in view of the red dotted line area in (a) and (b), respectively.

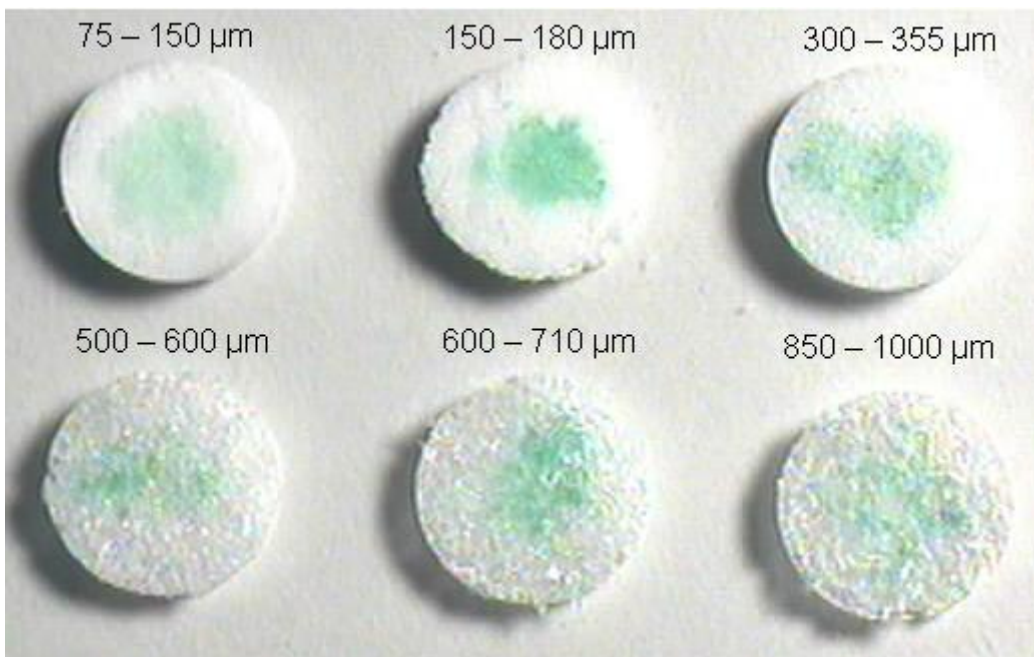

**Fig. S2** Ethanol with a small amount of green colored food dye was used to demonstrate the 3D interconnectivity of microporous PDMS structures fabricated by different sizes of pre-sieved sugar particles.

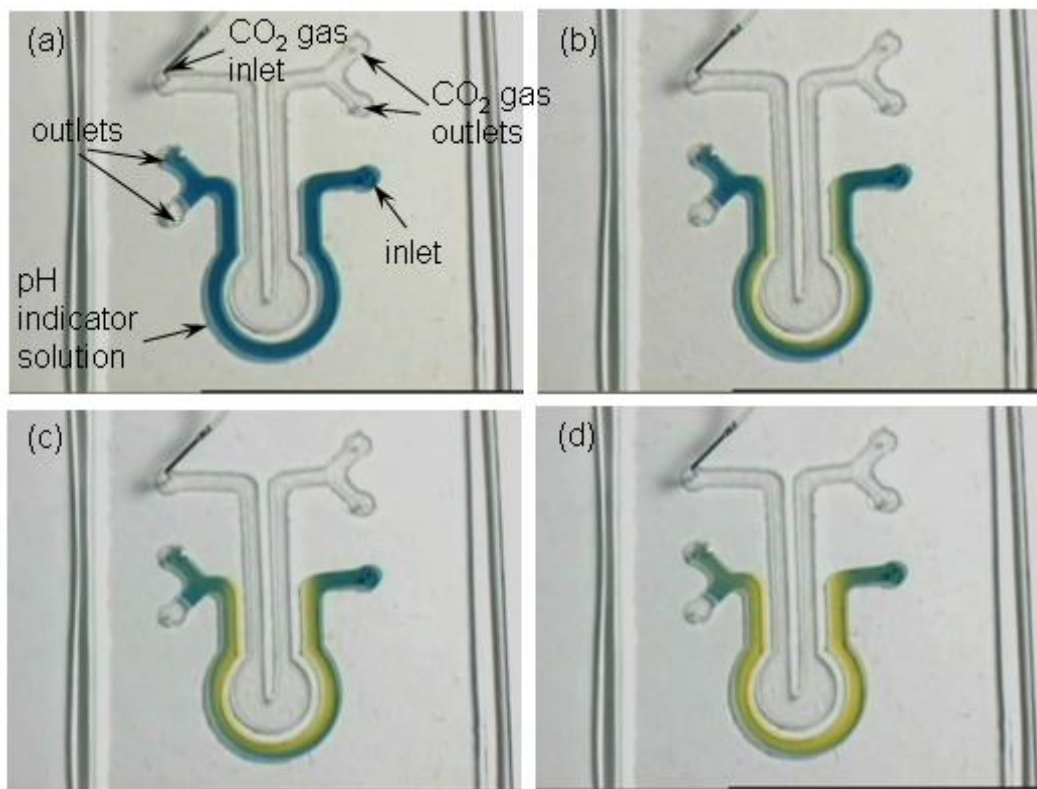

**Fig. S3** Time lapse images of acidification of water by CO<sub>2</sub> gas experiment using non-porous PDMS. (a) t = 0 s. (b) t = 4 min. (c) t = 6 min 30 s. (d) t = 9 min 30 s.

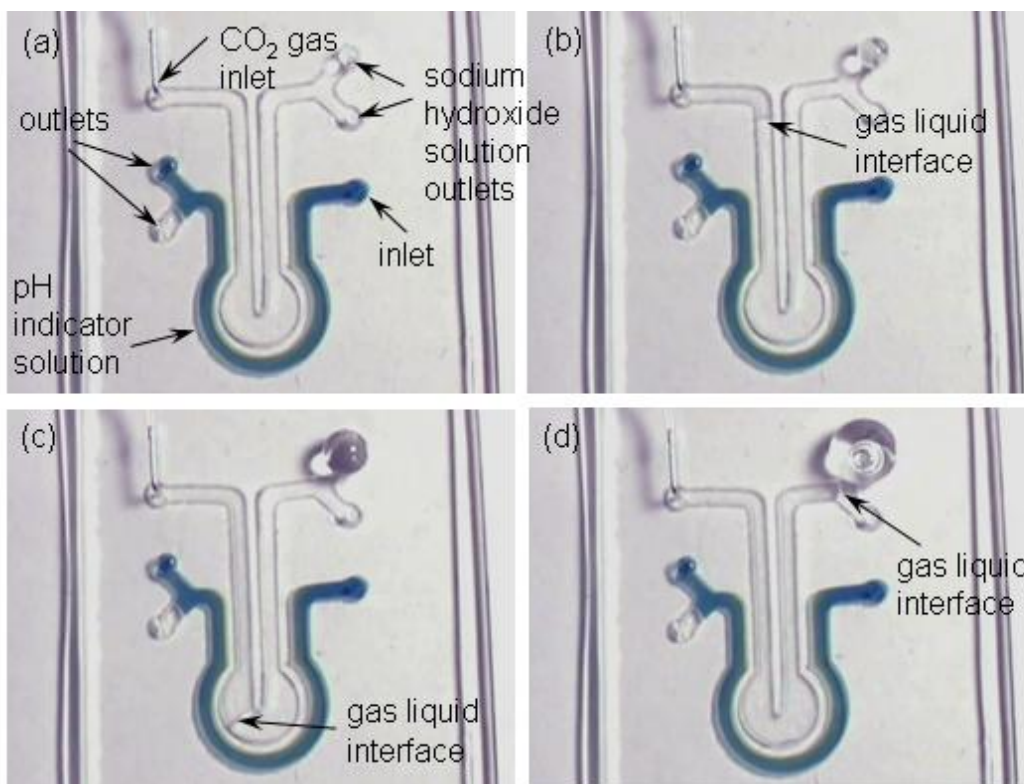

**Fig. S4** Time lapse images of acidification of water by CO<sub>2</sub> gas experiment using non-porous PDMS. The inner chamber was filled with sodium hydroxide solution. (a)  $t = 0$  s. (b)  $t = 2$  s. (c)  $t = 5$  s. (d)  $t = 10$  s.

**Video 1:**

Acidification of water by CO<sub>2</sub> gas experiment shown in Fig. 5.  
The video was speeded up 3 ×.

**Video 2:**

Acidification of water by CO<sub>2</sub> gas experiment shown in Fig. 8.  
The video was speeded up 10 ×.

**Video 3:**

Sodium hydroxide solution loading experiment.  
The video was speeded up 5 ×.

**Video 4:**

Acidification of water by CO<sub>2</sub> gas experiment shown in Fig. 6.  
The video was speeded up 30 ×.

**Video 5:**

Acidification of water by CO<sub>2</sub> gas experiment shown in Fig. 7.  
The video was in real time.

**Video 6:**

Ethanol with a small amount of green colored food dye was used to demonstrate the 3D interconnectivity of microporous PDMS structures fabricated by 150 – 180  $\mu\text{m}$  sugar particles. The video was in real time.
